# Supplementary material for: Tip-enhanced Raman spectroscopic measurement of stress change in the local domain of epitaxial graphene on the carbon face of 4H-SiC(000–1)
Source: Royal Society of Chemistry journal article supplement (doi:10.1039/c4cp02078b), 2014-01-01
Supplement: c4cp02078b1.pdf [file c4cp02078b1.pdf]

1 **Supporting Information.**

2 **Tip-Enhanced Raman Spectroscopic Measurement of Stress Change in**  
3 **Local domain of Epitaxial Graphene on the Carbon Face of 4H-SiC (000-1)**

4 *Toshiaki Suzuki,<sup>1</sup> Tamitake Itoh,<sup>2\*</sup> Sanpon Vantasin,<sup>1</sup> Satoshi Minami,<sup>1</sup> Yasunori Kutsuma,<sup>3</sup>*  
5 *Koji Ashida,<sup>3</sup> Tada-aki Kaneko,<sup>3</sup> Yusuke Morisawa,<sup>4</sup> Takeshi Miura,<sup>5</sup> and Yukihiro Ozaki<sup>1</sup>*

6

7 \*E-mail: tamitake-itou@aist.go.jp

8

9 **(1) SEM images of TERS active tips**

10 Figure S1 shows three typical SEM images of TERS tips showing strong, normal, and weak  
11 TERS signals. The curvature of a tip top looks the most important factor to obtain higher  
12 TERS enhancement, because we observed that tips generating strong TERS signals have always  
13 smaller curvatures. Now we plan to quantitatively reproduce the curvature dependence of  
14 TERS enhancement factors by the relationship among SEM images of tips, TERS  
15 experimental results, and FDTD (Finite-difference time-domain) calculations [S1].

16

17

18

19

20

21

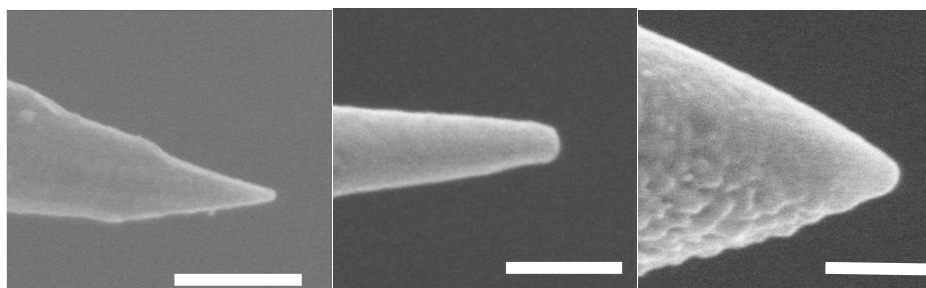

Fig. S1 SEM images of TERS tips generating (a) strong, (b) normal, and (c) weak TERS signals. Scale bars are 500 nm.

22

23 **(2) Position-dependent TERS spectra with AFM image**

24 Figure S2(a) shows an AFM image of a SiC surface. Surface roughness of the surface is  
25 indicated in Fig. S2(b). Position 1 to 6 depicted in Fig. S2(a) correspond to the detection  
26 positions of normal Raman spectra (upper panels) and TERS spectra (lower panels) in Fig.  
27 S2(c1-c6). We cannot find any correlation between the peak shift and the  $\Delta$ FWHM of the G  
28 band at different position 1 to 6, because the line detection does not cross ridge structures.

29

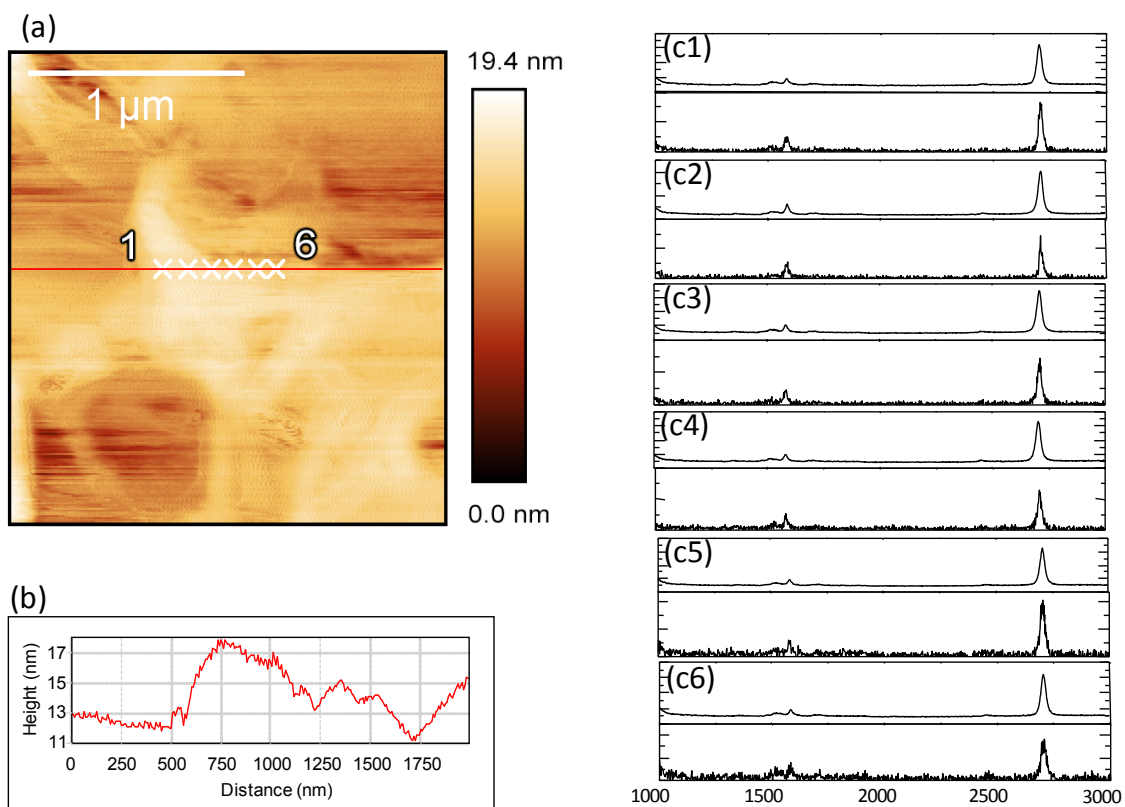

31

32

### 33 References for Supporting Information

34 [S1] Z. Yang, J. Aizpuruac, and H. Xu, *J. Raman Spectrosc.* 2009, 40, 1343–1348
